# Supplementary material for: Tertiary siRNAs Mediate Paramutation in C. elegans
Source: PubMed Central journal article supplement (PMC4374809; doi:10.1371/journal.pgen.1005078), 2015-03-26

Figure S2

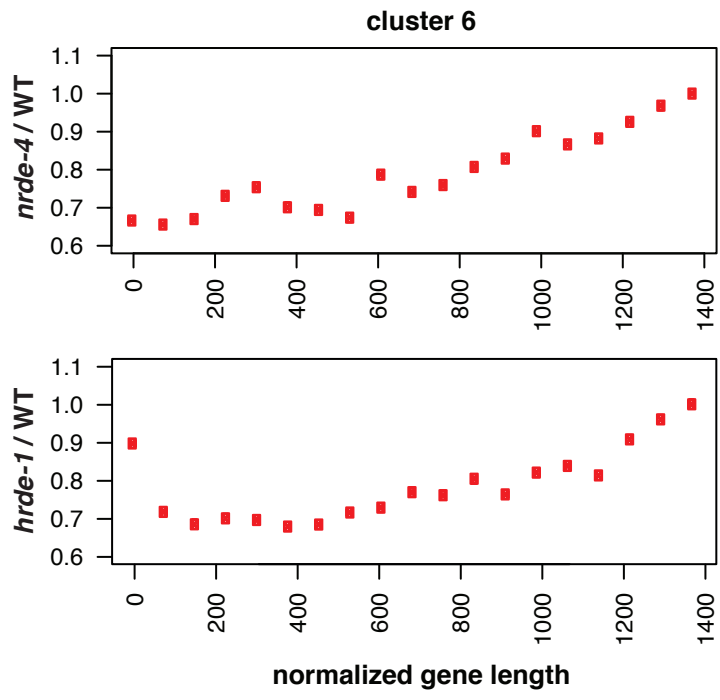

Supplement: pgen.1005078.s003.pdf [file pgen.1005078.s003.pdf]
