# Supplementary material for: Tertiary siRNAs Mediate Paramutation in C. elegans
Source: PubMed Central journal article supplement (PMC4374809; doi:10.1371/journal.pgen.1005078), 2015-03-26

Figure S5

A

*operon*  
empty vector

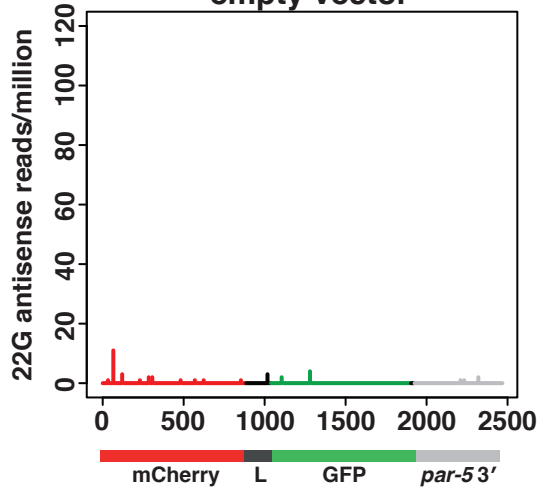

*operon*  
P0 GFP RNAi

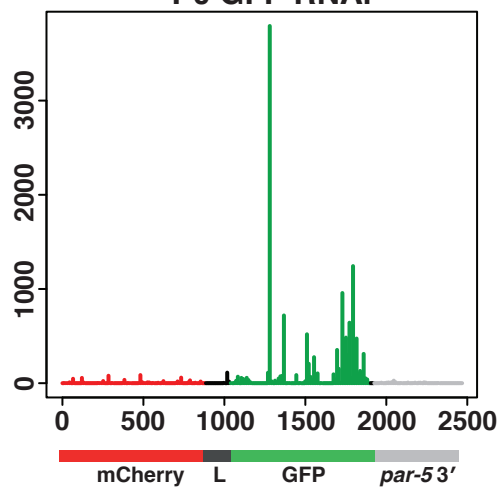

*operon*  
F2 after GFP RNAi

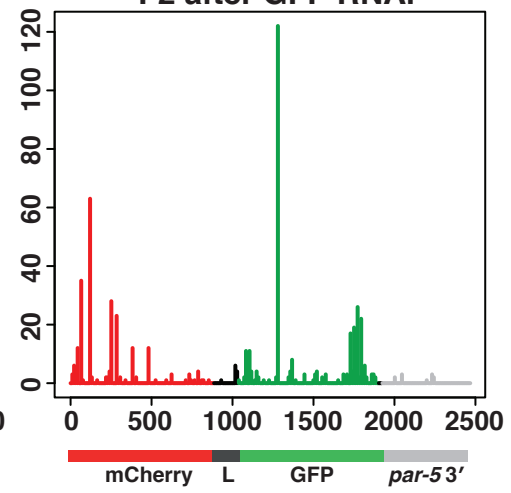

B

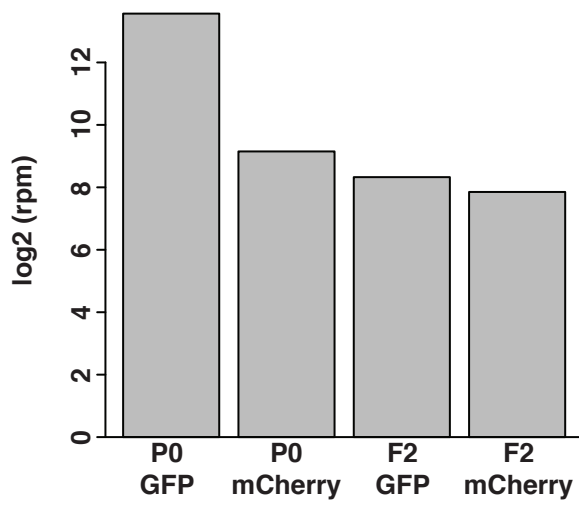

Supplement: pgen.1005078.s006.pdf [file pgen.1005078.s006.pdf]
