# Supplementary material for: Tertiary siRNAs Mediate Paramutation in C. elegans
Source: PubMed Central journal article supplement (PMC4374809; doi:10.1371/journal.pgen.1005078), 2015-03-26
Supplement: pgen.1005078.s010.pdf [file pgen.1005078.s010.pdf]

**Table S1, trans-silencing and paramutation testing.**

| <b>Paternal genotype</b> | <b>Maternal genotype</b> | <b>F1 genotype (TG1/TG2 or TG1/+; TG2/+)</b> | <b>Expression TG1</b> | <b>Expression TG2</b> |
|--------------------------|--------------------------|----------------------------------------------|-----------------------|-----------------------|
| <i>piRNA sensor</i>      | <i>operon</i>            | <i>piRNA sensor/operon</i>                   | OFF                   | OFF                   |
| <i>operon</i>            | <i>piRNA sensor</i>      | <i>piRNA sensor/operon</i>                   | OFF                   | OFF                   |
| <i>piRNA sensor</i>      | <i>mCherry::H2A</i>      | <i>piRNA sensor/+; mCherry::H2A/+</i>        | OFF                   | ON                    |
| <i>mCherry::H2A</i>      | <i>piRNA sensor</i>      | <i>piRNA sensor/+; mCherry::H2A/+</i>        | OFF                   | ON                    |
| <i>operon (off)</i>      | <i>operon</i>            | <i>operon</i>                                | DIM/OFF               | N/A                   |
| <i>operon</i>            | <i>operon (off)</i>      | <i>operon</i>                                | OFF                   | N/A                   |
| <i>operon</i>            | <i>mCherry::H2A</i>      | <i>operon/mCherry::H2A</i>                   | ON                    | ON                    |
| <i>mCherry::H2A</i>      | <i>operon</i>            | <i>operon/mCherry::H2A</i>                   | ON                    | ON                    |
| <i>operon (off)</i>      | <i>mCherry::H2A</i>      | <i>operon/mCherry::H2A</i>                   | OFF                   | DIM                   |
| <i>mCherry::H2A</i>      | <i>operon (off)</i>      | <i>operon/mCherry::H2A</i>                   | OFF                   | OFF                   |
| <i>operon (off)</i>      | <i>H2B::GFP</i>          | <i>operon/+ ; H2B::GFP/+</i>                 | OFF                   | ON                    |
| <i>H2B::GFP</i>          | <i>operon (off)</i>      | <i>operon/+ ; H2B::GFP/+</i>                 | OFF                   | ON                    |
| <i>operon (off)</i>      | <i>GFP::H2B</i>          | <i>operon/+ ; GFP::H2B/+</i>                 | OFF                   | ON                    |
| <i>GFP::H2B</i>          | <i>operon (off)</i>      | <i>operon/+ ; GFP::H2B/+</i>                 | OFF                   | ON                    |
| <i>operon (off)/+</i>    | <i>mCherry::H2A</i>      | <i>operon/mCherry::H2A</i>                   | OFF                   | DIM                   |
|                          |                          | <i>+/mCherry::H2A</i>                        | N/A                   | DIM                   |
| <i>mCherry::H2A</i>      | <i>operon (off)/+</i>    | <i>operon/mCherry::H2A</i>                   | OFF                   | OFF                   |
|                          |                          | <i>+/mCherry::H2A</i>                        | N/A                   | OFF                   |
| <i>operon (off)</i>      | +                        | <i>operon/+</i>                              | OFF                   | N/A                   |
| +                        | <i>operon (off)</i>      | <i>operon/+</i>                              | OFF                   | N/A                   |
